# Supplementary material for: A Modified Phase Cycling Method for Complex-Valued MRI Reconstruction
Source: Int J Biomed Imaging. 2020 Nov 18;2020:8846220. doi: 10.1155/2020/8846220 (PMC7688360; doi:10.1155/2020/8846220)
Supplement: Supplementary Materials — The 256 × 256 brain data are acquired on 1.5 T GE Signa scanner (GE Healthcare, Waukesha, WI) with GRE sequence, supplied in a .mat file named “Dataset S1”. [file 8846220.f1.zip]

Archive with 1 entries (1 files):
- Dataset S1.mat
